# Supplementary material
Source: PubMed Central journal article supplement (PMC10170332)
Supplement: jama-e234902-s004.pdf [file jama-e234902-s004.pdf]

## Data Sharing Statement

### Data

**Data available:** Yes

**Data types:** Deidentified participant data

**How to access data:** Patient-level data will be available upon reasonable request to the corresponding author (Email: philippe.mathurin@chru-lille.fr).

**When available:** With publication

### Supporting Documents

**Document types:** None

### Additional Information

**Who can access the data:** Researchers whose proposed use of the data has been approved

**Types of analyses:** Data will be available for purposes directly related to the study subject area

**Mechanisms of data availability:** Data will be made available with investigator support after approval of a proposal and a signed data access agreement
